# Supplementary material
Source: Springer Nature journal article supplement (https://www.springermedizin.de/resource/supplementary/12889_2012_4797_MOESM2_ESM.pdf/9493234)

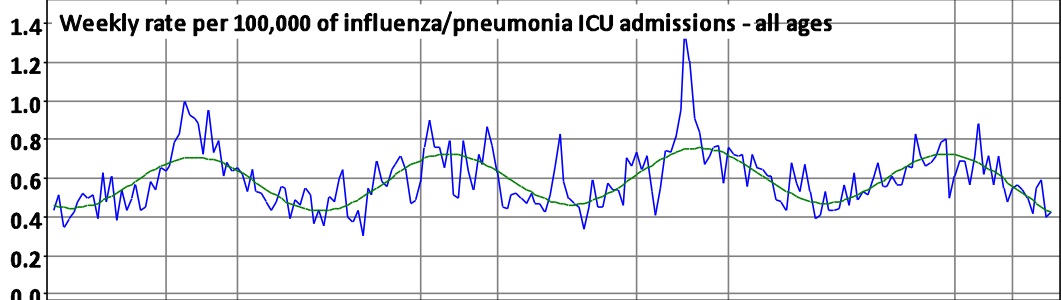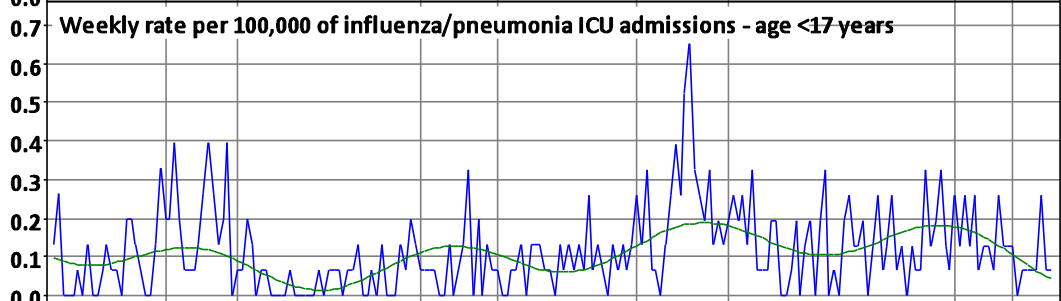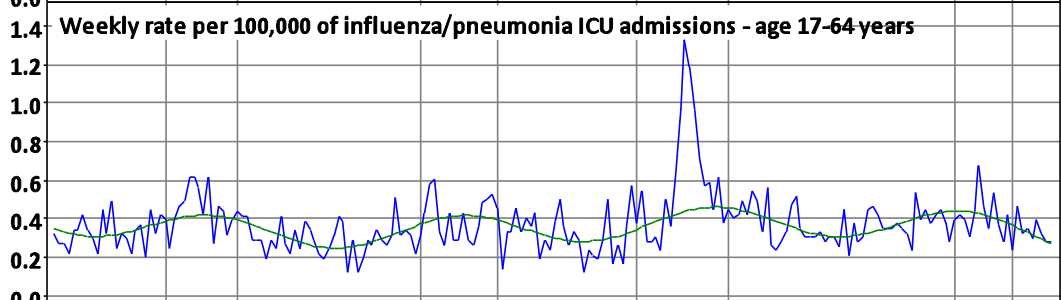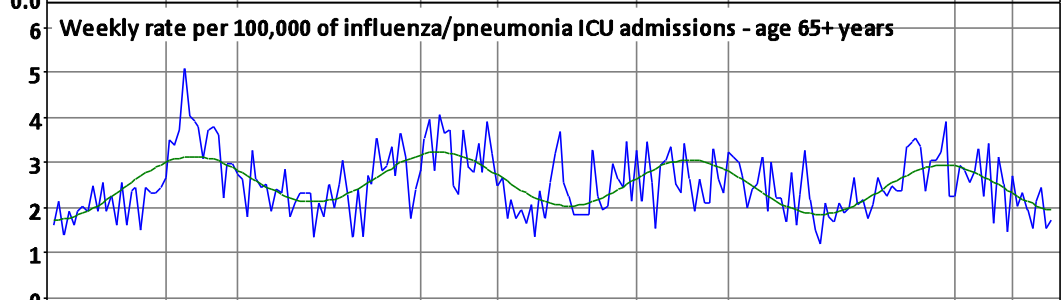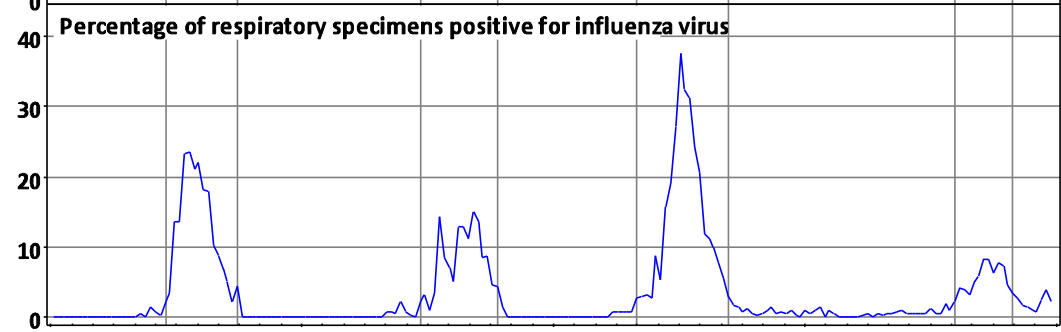

1JAN2007 1JAN2008 1JAN2009 1JAN2010 1JAN2011

Date of admission

Supplement: MOESM2 [file 9493234]
